# Supplementary material for: Cytokine‐Like Protein 1 (CYTL1) as a Key Target of M‐Stage Immune Infiltration in Stomach Adenocarcinoma
Source: Hindawi journal article supplement (doi:10.1155/2023/2926218), 2023-01-01
Supplement: f1 [file 2926218.f1.pdf]

**A**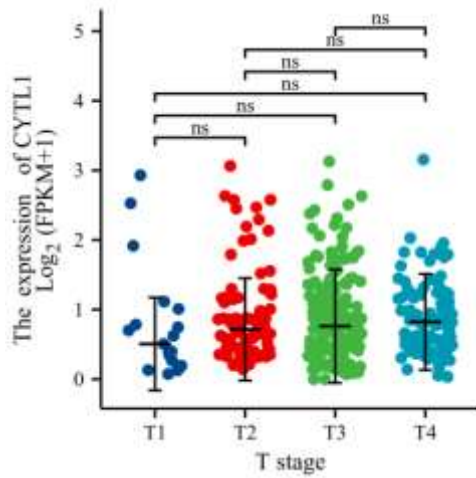**B**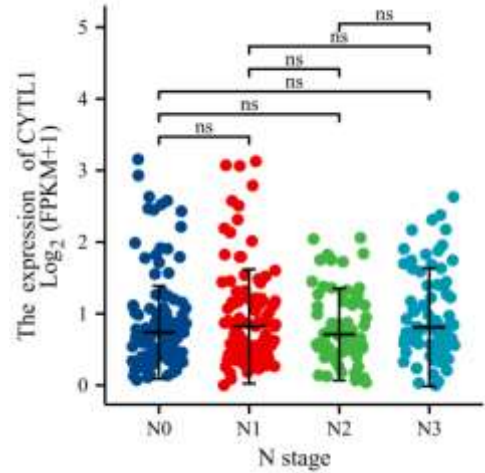

**Figure S1:A.**CYTL1 expression in T stage(T1&T2&T3&T4).**B.** CYTL1 expression in N stage(N0&N1&N2&N3). ns,  $p \geq 0.05$ ; \*,  $p < 0.05$ ; \*\*,  $p < 0.01$ ; \*\*\*,  $p \leq 0.001$ .
